# Supplementary material
Source: PubMed Central journal article supplement (PMC4085799)
Supplement: NIHMS595256-supplement-07.pdf [file NIHMS595256-supplement-07.pdf]

## Supplements

### Supplementary Tables

**Supplementary Table 1** Demography of the combined studies

| References                   | Studies  | Years | Diagnosis Criteria | Ethnicities                              | No. Cases<br>No. Families | No. Controls | Phenotypes of Cases                                       | rs6313<br>(102T/C) | rs6311 (-<br>1438A/G) |
|------------------------------|----------|-------|--------------------|------------------------------------------|---------------------------|--------------|-----------------------------------------------------------|--------------------|-----------------------|
| <b>Europeans</b>             |          |       |                    |                                          |                           |              |                                                           |                    |                       |
| (Fehr et al. 2001)           | Fehr     | 2001  | DSM-IV             | German (male)                            | 130                       | 56           | Alcohol dependence                                        | +                  |                       |
| (Fehr et al. 2001)           | Fehr     | 2001  | DSM-IV             | German (female)                          | 46                        | 19           | Alcohol dependence                                        | +                  |                       |
| (Parsian and Cloninger 2001) | Parsian  | 2001  | DSM-III-R          | Caucasian                                | 133                       | 88           | Alcohol dependence                                        |                    | +                     |
| (Hill et al. 2002)           | Hill     | 2002  | DIS-III-R          | Caucasian, Hispanic,<br>African-American | HRR:<br>35 families       |              | Type II alcoholism<br>(antisocial)                        | +                  |                       |
| (Wrzosek et al. 2012)        | Wrzosek  | 2012  | DSM-IV & ICD-10    | Caucasian Polish                         | 150                       | 80           | Alcohol dependence                                        | +                  |                       |
| <b>Hispanics</b>             |          |       |                    |                                          |                           |              |                                                           |                    |                       |
| (Saiz et al. 2008)           | Saiz     | 2008  | DSM-IV             | Spanish                                  | 113                       | 420          | Heroin dependence                                         |                    | +                     |
| (Polina et al. 2009)         | Polina   | 2009  | DSM-IV             | European Brazilian<br>(male)             | 113                       | 115          | Alcohol dependence                                        |                    | +                     |
| <b>Asians</b>                |          |       |                    |                                          |                           |              |                                                           |                    |                       |
| (Nakamura et al. 1999)       | Nakamura | 1999  | DSM-III-R          | Japanese                                 | 507                       | 361          | Alcohol dependence                                        |                    | +                     |
| (Himeji et al. 2000)         | Himeji   | 2000  | DSM-111-R          | Japanese                                 | 91                        | 90           | Alcohol dependence                                        | +                  |                       |
| (Hwu and Chen 2000)          | Hwu      | 2000  | DSM-III            | Chinese                                  | 85                        | 70           | Alcohol abuse                                             | +                  |                       |
| (Hwu and Chen 2000)          | Hwu      | 2000  | DSM-III            | Chinese                                  | 75                        |              | Alcohol dependence                                        | +                  |                       |
| (Wang et al. 2001)           | Wang     | 2001  | CCMD-2-R           | Chinese                                  | 72                        | 109          | Heroin dependence                                         | +                  |                       |
| (Cao et al. 2002)            | Cao      | 2002  | DSM-IV & ICD-10    | Chinese Han (male)                       | 192                       | 111          | Heroin dependence                                         |                    | +                     |
| (Cao et al. 2002)            | Cao      | 2002  | DSM-IV & ICD-10    | Chinese Han (female)                     | 73                        | 84           | Heroin dependence                                         |                    | +                     |
| (Li et al. 2002)             | Li       | 2002  | DSM-IV             | Chinese Han                              | 121                       | 194          | Heroin abuse                                              | +                  | +                     |
| (Terayama et al. 2003)       | Terayama | 2003  | DSM-IV             | Japanese                                 | 41                        | 112          | Alcohol dependence                                        | +                  | +                     |
| (Shao et al. 2005)           | Shao     | 2005  | DSM-IV             | Chinese Han                              | 380                       | 275          | Heroin dependence                                         |                    | +                     |
| (Lee et al. 2009)            | Lee      | 2009  | DSM-IV             | Korean male                              | 97                        | 76           | Alcohol dependence                                        | +                  |                       |
| (Tsunoka et al. 2010)        | Tsunoka  | 2010  | ICD-10-DCR         | Japanese                                 | 196                       | 802          | Methamphetamine<br>dependence (with induced<br>psychosis) | +                  | +                     |
| (Yang et al. 2010)           | Yang     | 2010  | DSM-IV             | Chinese (male)                           | 588                       | 194          | Heroin dependence                                         |                    | +                     |
| (Gao et al. 2011)            | Gao      | 2011  | DSM-IV             | Chinese Han                              | 303                       | 300          | Heroin dependence                                         | +                  | +                     |

DSM = *Diagnostic and Statistical Manual of Mental Disorders*;

ICD = *International Statistical Classification of Diseases and Related Health Problems*;

CCMD = *Chinese Classification of Mental Disorders*.

Eight-six cases were diagnosed as type II alcoholism in the reference(Parsian and Cloninger 2001). The male and female subjects were analyzed as two independent studies for the two references(Cao et al. 2002; Fehr et al. 2001) and the studies of alcohol abuse and alcohol dependence were also analyzed as two independent studies in the reference(Hwu and Chen 2000). These studies included 3,506 cases and 3,556 controls, and 35 small nuclear families for the *HTR2A* rs6313 and rs6311 (or 3,820 cases and 3,776 controls including one study for *HTR2C*). The last three columns mark the studies included in the corresponding meta-analysis.

**Supplementary Table 2** Results of the overall and sub-group analyses for the dominant and recessive models

| SNPs / Groups                         | Studies <sup>a</sup> | Samples <sup>b</sup> | LnOR (95% CI)       | OR (95% CI)      | P(Z)           | P(Q)   | LnOR (95% CI)       | OR (95% CI)      | P(Z)          | P(Q)   |
|---------------------------------------|----------------------|----------------------|---------------------|------------------|----------------|--------|---------------------|------------------|---------------|--------|
|                                       |                      |                      |                     |                  | Dominant model |        |                     | Recessive model  |               |        |
| <b><i>HTR2A</i> rs6313 (102T/C)</b>   |                      |                      |                     |                  |                |        |                     |                  |               |        |
| All the studies                       | 12                   | 1,407/1,908          | -0.19 (-0.35,-0.04) | 0.82 (0.71,0.96) | <b>0.0122</b>  | 0.5888 | -0.23 (-0.5,0.03)   | 0.79 (0.61,1.03) | 0.0836        | 0.0227 |
| Europeans                             | 3                    | 326/155              | -0.28 (-0.69,0.13)  | 0.76 (0.5,1.14)  | 0.1854         | 0.2523 | -0.56 (-1.06,-0.07) | 0.57 (0.35,0.94) | <b>0.026</b>  | 0.4194 |
| Asians                                | 9                    | 1,081/1,753          | -0.17 (-0.32,-0.02) | 0.85 (0.73,0.98) | <b>0.0267</b>  | 0.5926 | -0.17 (-0.46,0.13)  | 0.85 (0.63,1.14) | 0.2661        | 0.0239 |
| Alcohol dependence (abuse)            | 8                    | 715/503              | -0.29 (-0.5,-0.09)  | 0.75 (0.61,0.92) | <b>0.0056</b>  | 0.6728 | -0.45 (-0.87,-0.02) | 0.64 (0.42,0.98) | <b>0.0403</b> | 0.0487 |
| <b><i>HTR2A</i> rs6311 (-1438A/G)</b> |                      |                      |                     |                  |                |        |                     |                  |               |        |
| All the studies                       | 12                   | 2,760/3,056          | -0.07 (-0.22,0.07)  | 0.93 (0.81,1.08) | 0.3333         | 0.2035 | 0.12 (-0.07,0.31)   | 1.13 (0.93,1.36) | 0.2207        | 0.0208 |
| Europeans & Hispanic                  | 3                    | 359/623              | 0.44 (0.07,0.82)    | 1.56 (1.07,2.27) | <b>0.0205</b>  | 0.6965 | 0.63 (0.25,1.02)    | 1.89 (1.29,2.77) | <b>0.0012</b> | 0.6047 |
| Asians                                | 9                    | 2,401/2,433          | -0.16 (-0.32,0)     | 0.85 (0.73,1)    | <b>0.044</b>   | 0.7861 | 0.01 (-0.12,0.14)   | 1.01 (0.88,1.15) | 0.9067        | 0.1709 |
| Heroin dependence (abuse)             | 7                    | 1,770/1,578          | -0.02 (-0.22,0.17)  | 0.98 (0.81,1.18) | 0.8067         | 0.236  | 0.14 (-0.03,0.3)    | 1.15 (0.97,1.36) | 0.1079        | 0.7183 |
| Alcohol dependence (abuse)            | 4                    | 794/676              | -0.18 (-0.44,0.09)  | 0.84 (0.64,1.1)  | 0.1969         | 0.1052 | -0.26 (-0.55,0.02)  | 0.77 (0.58,1.02) | 0.0707        | 0.1399 |

<sup>a</sup>, the number of studies included are indicated.

<sup>b</sup>, the number of cases/controls.

*P*(Z): Z test used to determine the significance of the overall OR. The *P* values < 0.05 are indicated in red boldfaces.

*P*(Q): Cochran's X<sup>2</sup>-based Q statistic test used to assess the heterogeneity.

*P*(T): T test used to estimate the significance of publication bias (not shown).

**Supplementary Table 3** Results of sensitivity analysis

| Polymorphisms/Studies                                | LnOR (95% CI)       | OR (95% CI)      | P value | df | P(Q)   |
|------------------------------------------------------|---------------------|------------------|---------|----|--------|
| <b>rs6313 (102T/C): For all the combined studies</b> |                     |                  |         |    |        |
| Fehr 2001                                            | -0.16 (-0.28,-0.05) | 0.85 (0.76,0.95) | 0.0039  | 11 | 0.1923 |
| Fehr 2001                                            | -0.15 (-0.26,-0.04) | 0.86 (0.77,0.96) | 0.0085  | 11 | 0.2398 |
| Hill 2002                                            | -0.14 (-0.25,-0.03) | 0.87 (0.78,0.97) | 0.0099  | 11 | 0.2791 |
| Wrzosek 2012                                         | -0.13 (-0.24,-0.02) | 0.88 (0.78,0.98) | 0.0221  | 11 | 0.3005 |
| Himei 2000                                           | -0.15 (-0.26,-0.04) | 0.86 (0.77,0.96) | 0.0093  | 11 | 0.1854 |
| Hwu 2000                                             | -0.16 (-0.27,-0.05) | 0.86 (0.77,0.95) | 0.005   | 11 | 0.1752 |
| Hwu 2000                                             | -0.16 (-0.27,-0.05) | 0.85 (0.77,0.95) | 0.0044  | 11 | 0.1818 |
| Wang 2001                                            | -0.17 (-0.28,-0.06) | 0.84 (0.75,0.94) | 0.0026  | 11 | 0.2373 |
| Li 2002                                              | -0.17 (-0.28,-0.05) | 0.85 (0.75,0.95) | 0.0038  | 11 | 0.1962 |
| Terayama 2003                                        | -0.16 (-0.27,-0.05) | 0.86 (0.77,0.96) | 0.0056  | 11 | 0.1752 |
| Lee 2009                                             | -0.12 (-0.23,-0.01) | 0.89 (0.79,0.99) | 0.0343  | 11 | 0.6456 |
| Tsunoka 2010                                         | -0.2 (-0.32,-0.07)  | 0.82 (0.73,0.93) | 0.002   | 11 | 0.2618 |
| Gao 2011                                             | -0.17 (-0.3,-0.05)  | 0.84 (0.74,0.95) | 0.0054  | 11 | 0.1937 |
| <b>rs6313 (102T/C): Alcohol dependence (abuse)</b>   |                     |                  |         |    |        |
| Fehr 2001                                            | -0.4 (-0.59,-0.21)  | 0.67 (0.55,0.81) | 3.8E-05 | 7  | 0.6243 |
| Fehr 2001                                            | -0.33 (-0.51,-0.15) | 0.72 (0.6,0.86)  | 3.6E-04 | 7  | 0.4085 |
| Hill 2002                                            | -0.32 (-0.51,-0.14) | 0.72 (0.6,0.87)  | 4.8E-04 | 7  | 0.4467 |
| Wrzosek 2012                                         | -0.32 (-0.52,-0.12) | 0.73 (0.6,0.89)  | 1.6E-03 | 7  | 0.3965 |
| Himei 2000                                           | -0.36 (-0.56,-0.17) | 0.69 (0.57,0.84) | 2.5E-04 | 7  | 0.3871 |
| Hwu 2000                                             | -0.35 (-0.53,-0.17) | 0.7 (0.59,0.84)  | 1.2E-04 | 7  | 0.3863 |
| Hwu 2000                                             | -0.36 (-0.54,-0.18) | 0.7 (0.58,0.84)  | 9.3E-05 | 7  | 0.4303 |
| Terayama 2003                                        | -0.37 (-0.56,-0.18) | 0.69 (0.57,0.83) | 1.1E-04 | 7  | 0.4363 |
| Lee 2009                                             | -0.28 (-0.47,-0.08) | 0.76 (0.63,0.92) | 5.1E-03 | 7  | 0.7209 |
| <b>rs6311 (-1438A/G): European populations</b>       |                     |                  |         |    |        |
| Parsian 2001                                         | 0.4 (0.17,0.63)     | 1.5 (1.19,1.89)  | 0.0006  | 1  | 0.9141 |
| Saiz 2008                                            | 0.42 (0.15,0.68)    | 1.52 (1.16,1.98) | 0.0023  | 1  | 0.8269 |
| Polina 2009                                          | 0.43 (0.19,0.66)    | 1.53 (1.21,1.94) | 0.0004  | 1  | 0.892  |

**Supplementary Table 4** Pair-wise LD measures ( $D'$  and  $r^2$  values) of the HapMap European and Asian samples.

*The results are shown in the Microsoft Excel file “Supplementary Table 4 LD.xlsx.”*

## **Supplementary Figures**

**Supplementary Figure 1** Forest plots of ln(OR) and overall ln(OR) with 95% CI of the allelic and genotypic analyses for rs6311.

**Supplementary Figure 2** Egger's funnel plots of the combined studies of alcohol dependence (abuse) for rs6313.

**Supplementary Figure 3** Retrospective analysis of all the combined studies for - rs6313.

**Supplementary Figure 4** Retrospective analysis of the combined studies of alcohol dependence (abuse) for rs6313.

**Supplementary Figure 5** Graphical representation of the LD structure of European ancestry. The LD structure, spanning 200 kp covering the *HTR2A* gene, was constructed using European genotype data of 273 SNPs. The current two polymorphisms are shown in red; other polymorphisms are shown in blue. The *HTR2A* gene, size 62, 662 bp, is indicated in red. Vertical tick marks above the name indicate the relative genomic position of each SNP. The LD structure represents the pairwise calculation of  $D'$  for each possible combination of SNPs.  $D' < 0.5$  is shown in white,  $D' = 1.0$  in dark red, with increasing shades of red representing increasing  $D'$  between the SNPs.

**Supplementary Figure 6** Graphical representation of the LD structure of Asian ancestry. The LD structure, spanning 200 kp covering the *HTR2A* gene, was constructed using Asian genotype data of 249 SNPs.
