# Supplementary material
Source: PubMed Central journal article supplement (PMC4085799)

**HTR2A rs6311 (-1438A/G) LnOR (95% CI)**

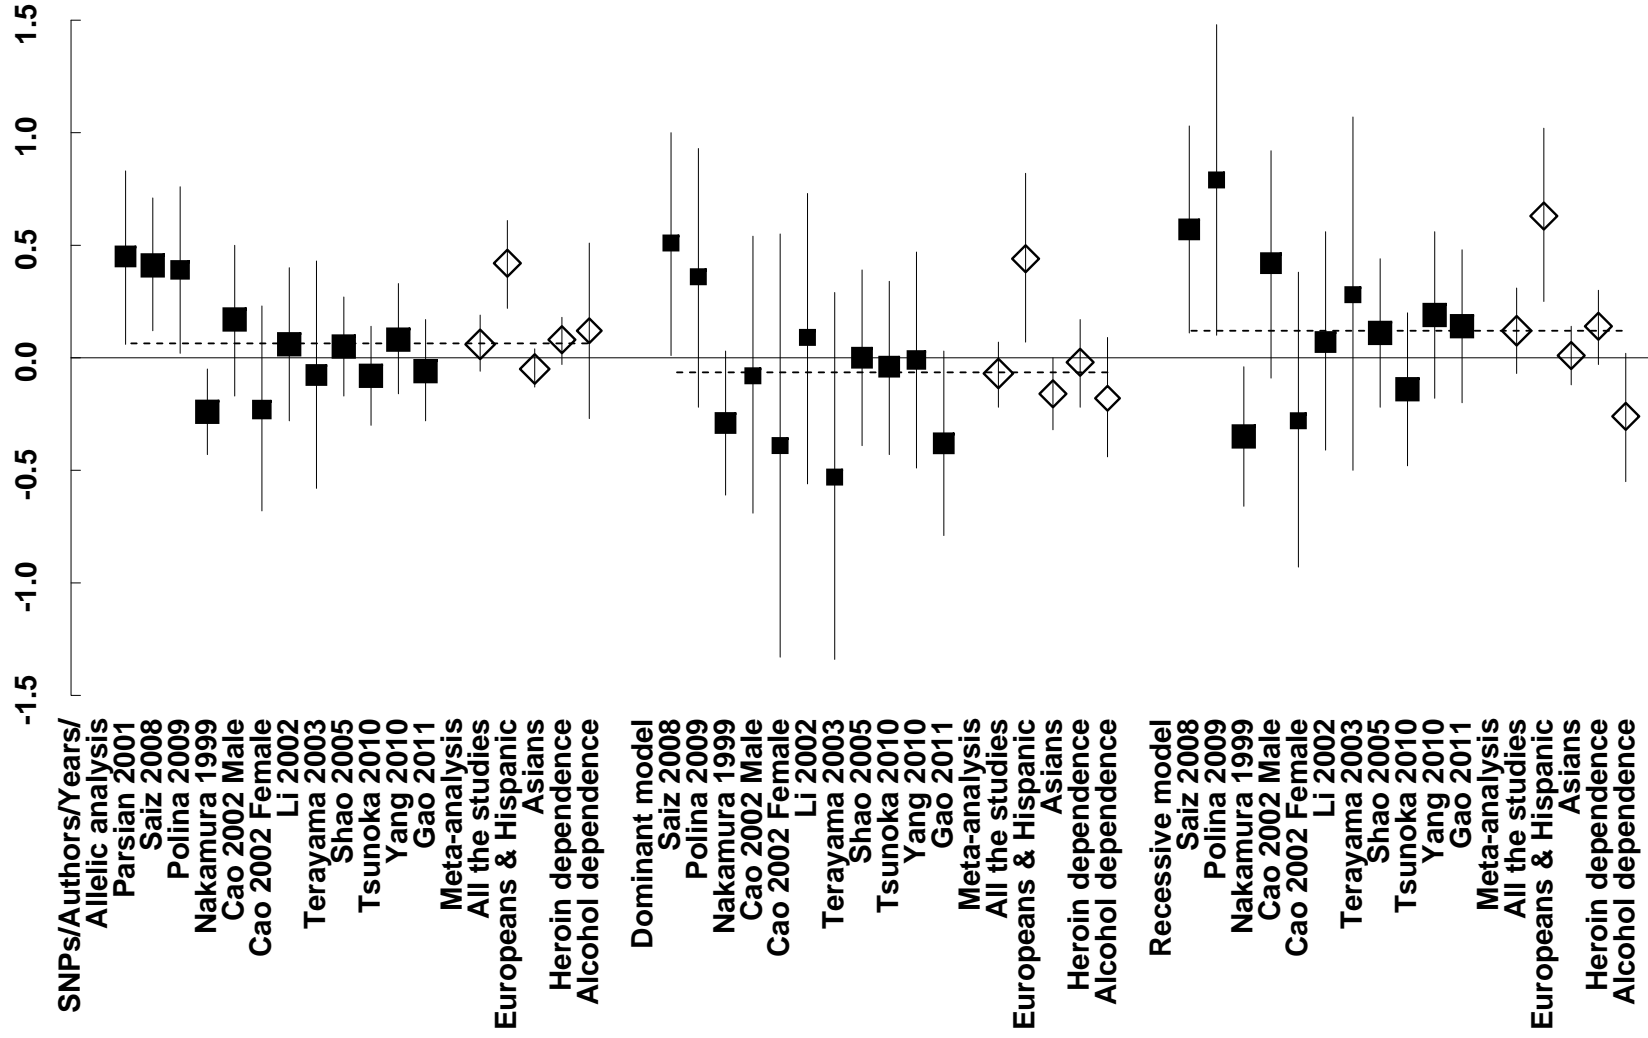

Supplement: NIHMS595256-supplement-Supplementary_Figure_1.pdf [file NIHMS595256-supplement-Supplementary_Figure_1.pdf]

***HTR2A* rs6313 (102T/C) (Allelic Analysis)**

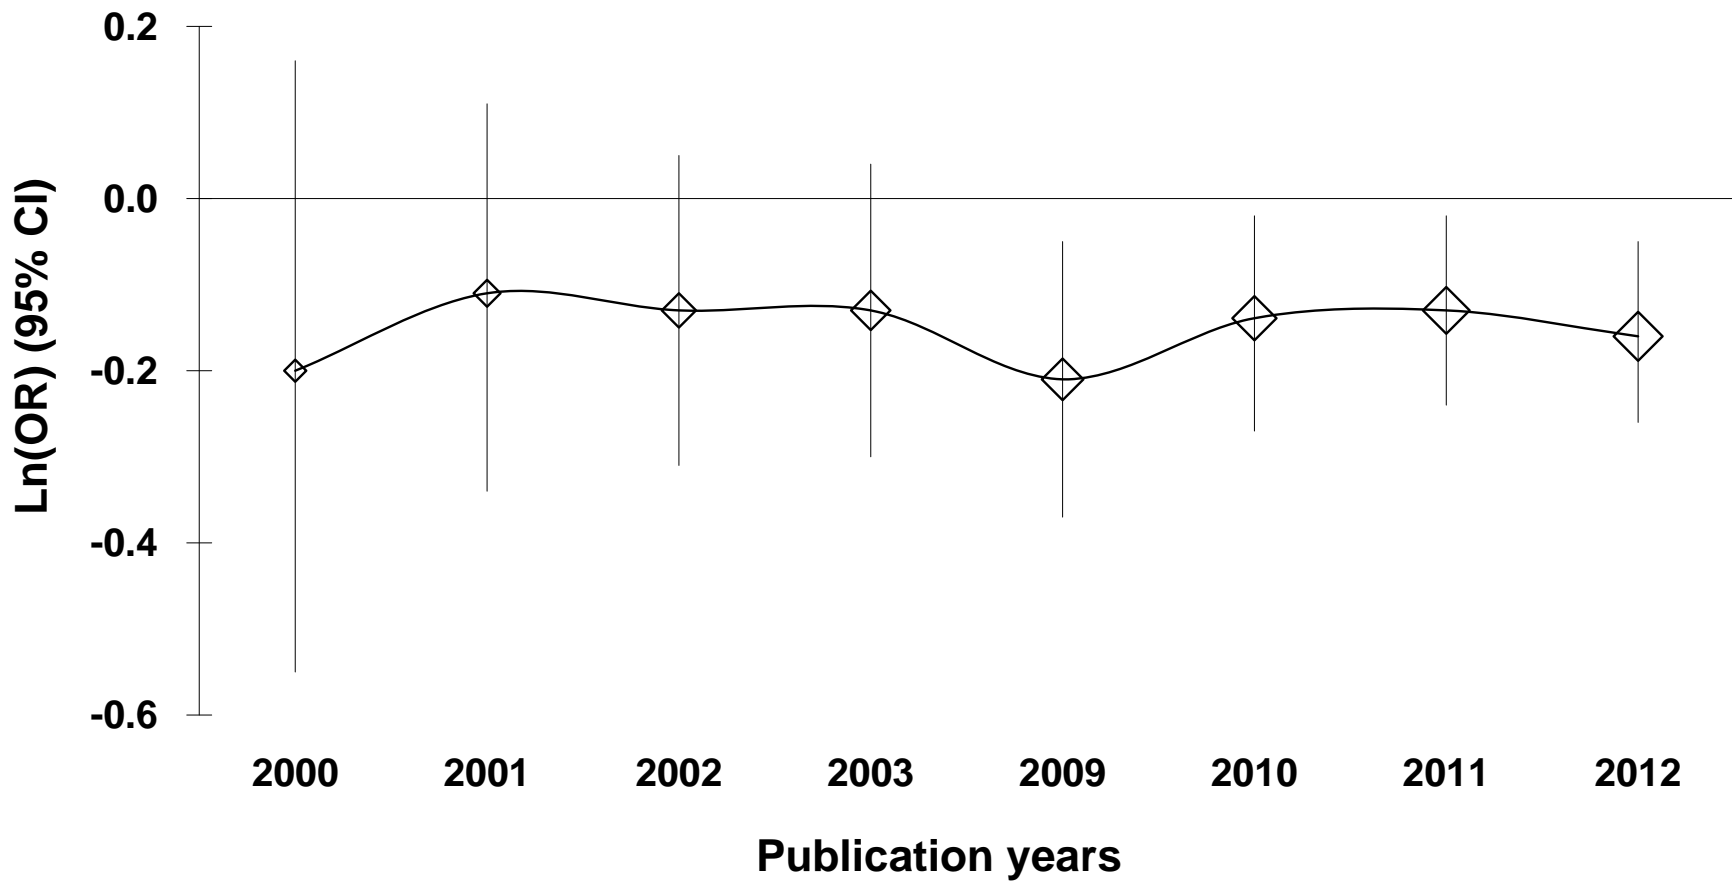

Supplement: NIHMS595256-supplement-Supplementary_Figure_3.pdf [file NIHMS595256-supplement-Supplementary_Figure_3.pdf]

***HTR2A* rs6313 (102T/C) Alcohol Dependence/Abuse (Allelic)**

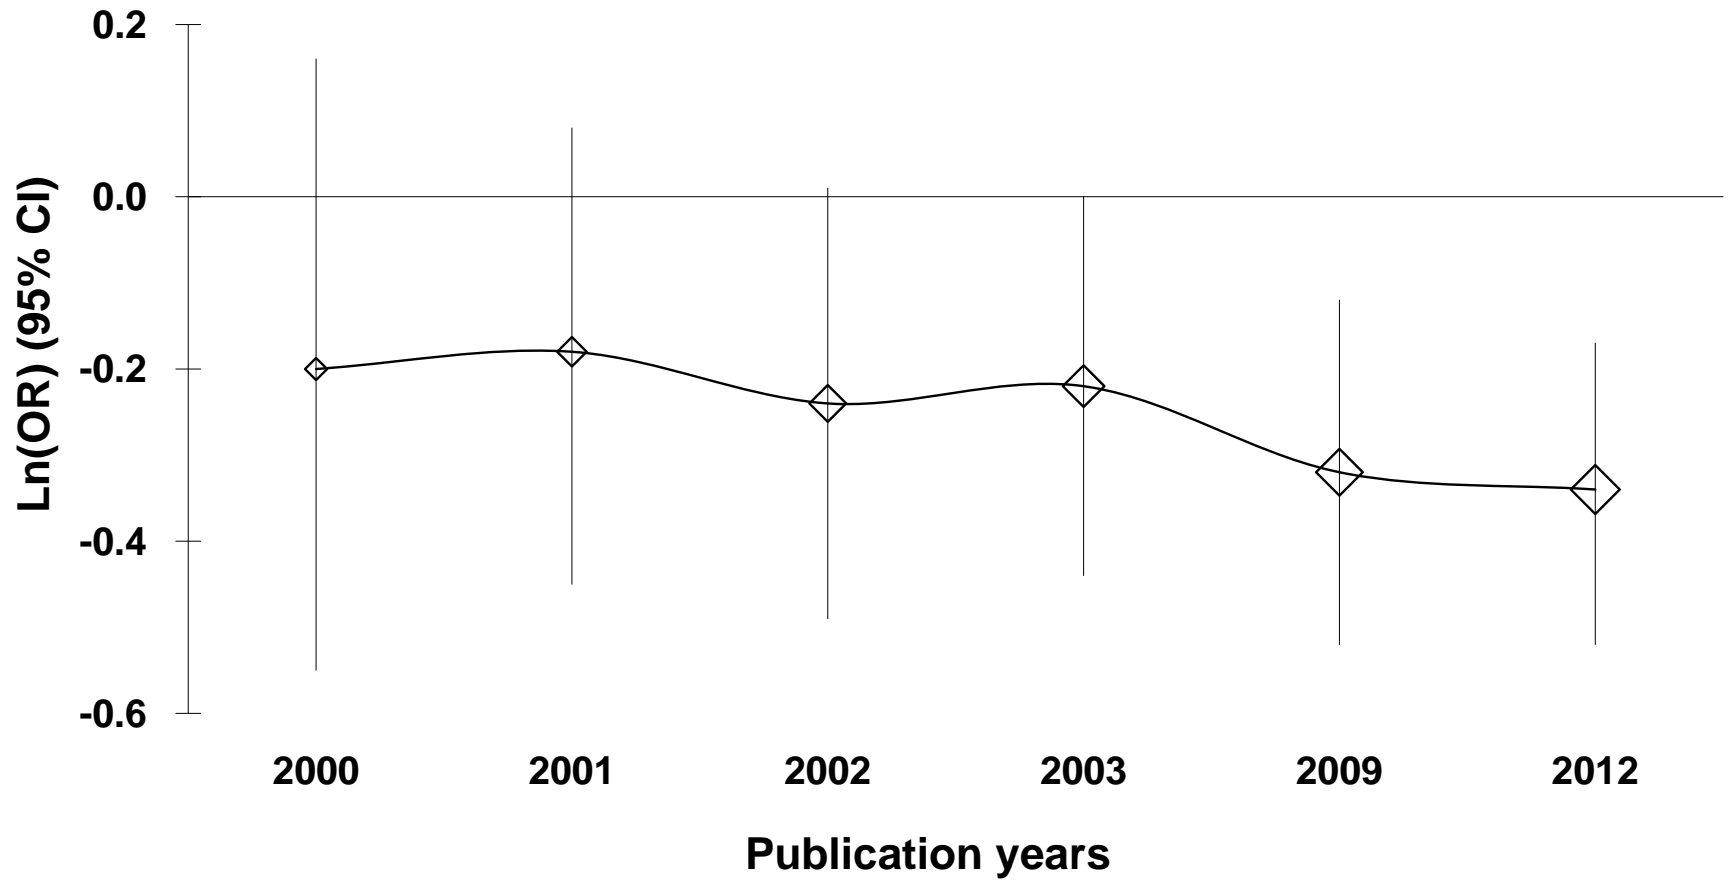

Supplement: NIHMS595256-supplement-Supplementary_Figure_4.pdf [file NIHMS595256-supplement-Supplementary_Figure_4.pdf]
